# Supplementary material for: Flexible logic circuits based on top-gate thin film transistors with printed semiconductor carbon nanotubes and top electrodes
Source: Royal Society of Chemistry journal article supplement (doi:10.1039/c4nr05471g), 2014-10-13
Supplement: c4nr05471g1.pdf [file c4nr05471g1.pdf]

### Supporting Information

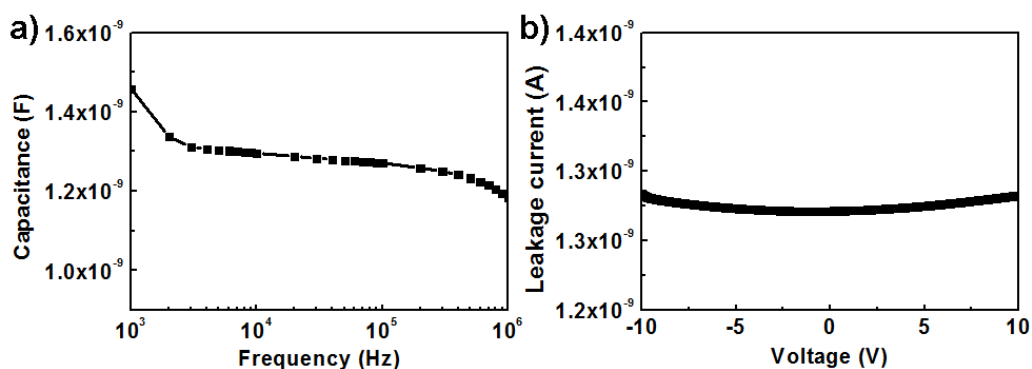

**Figure S1.** The F-C and I-V curves of 50 nm HfO<sub>x</sub> thin film by ALD. As shown in Figure S1, the effective capacitance of 50 nm HfO<sub>x</sub> is about  $1.29 \times 10^{-9}$  F, and the corresponding effective area is  $6.6 \times 10^{-7}$  m<sup>2</sup>. So the capacitance per unit area is  $\sim 0.196$   $\mu$ F cm<sup>-2</sup>. To evaluate the quality of HfO<sub>x</sub>, the leakage current of the capacitor was measured at the applied voltage in the ranges -10 to 10 V. As illustrated in Figure S1b, leakage current is about  $10^{-9}$  A, suggesting that it can be used to act as the dielectric layer.

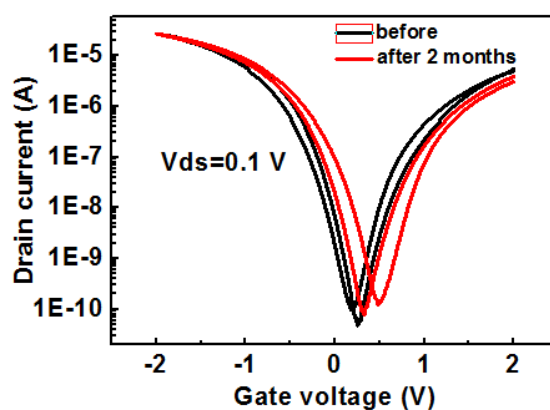

**Figure S2.** Typical transfer characteristics of printed top-gate TFTs before and after 2 months.

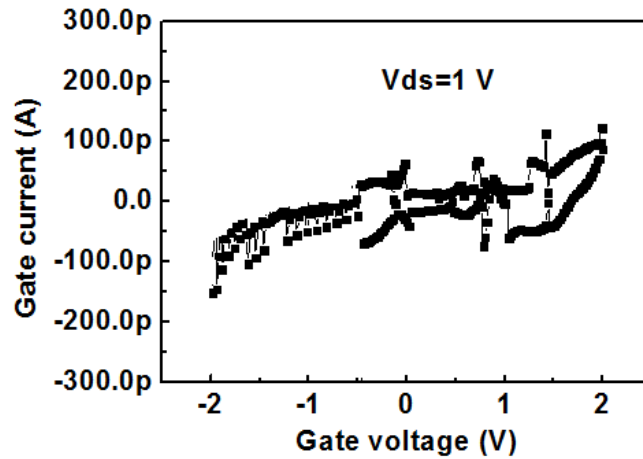

**Figure S3.** Leakage current of printed top-gate SWCNT TFTs using 50 nm  $\text{HfO}_x$  as dielectric layer.

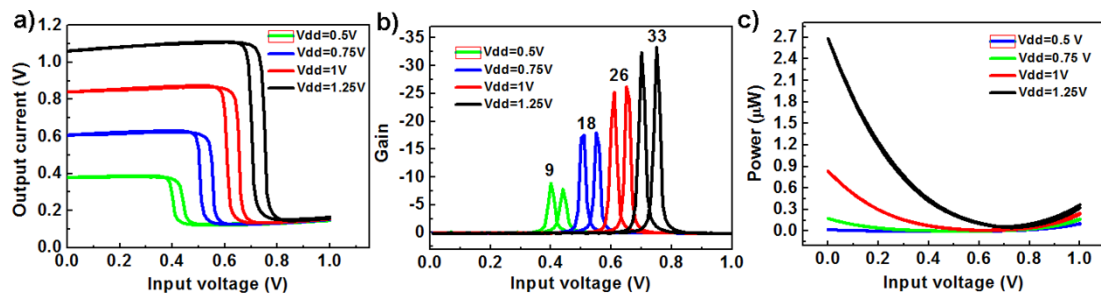

**Figure S4.** a) The voltage input-output, b) gain characteristics, and c) the power consumption of a printed inverter with different supply voltages after repeatedly bending 100 times. The maximum voltage gain is 9, 18, 26 and 33, respectively.
